# Supplementary material for: Role of MoS2and WS2monolayers on photocatalytic hydrogen production and the pollutant degradation of monoclinic BiVO4: a first-principles study
Source: Royal Society of Chemistry journal article supplement (doi:10.1039/c7nj02340e), 2017-01-01
Supplement: c7nj02340e1.pdf [file c7nj02340e1.pdf]

**Role of MoS<sub>2</sub> and WS<sub>2</sub> monolayers on the photocatalytic hydrogen production and pollutant degradation of monoclinic BiVO<sub>4</sub>: a first-principles study**

Francis Opoku<sup>a</sup>, Krishna Kuben Govender<sup>b</sup>, Cornelia Gertina Catharina Elizabeth van Sittert<sup>c</sup>, Penny Poomani Govender<sup>a,\*</sup>

<sup>a</sup> Francis Opoku

Department of Applied Chemistry, University of Johannesburg, P. O. Box 17011,  
Doornfontein Campus, 2028, Johannesburg, South Africa

Email: ofrancis2010@gmail.com

<sup>b</sup> Krishna Kuben Govender

Council for Scientific and Industrial Research, Meraka Institute, Center for High Performance Computing, 15 Lower Hope Road, Rosebank, Cape Town, 7700, South Africa

Email: kgovender3@csir.co.za

<sup>c</sup> Cornelia Gertina Catharina Elizabeth van Sittert

Research Focus Area for Chemical Resource Beneficiation: Laboratory of Applied Molecular Modelling, North-West University, Potchefstroom, 2520, South Africa

Email: cornie.vansittert@nwu.ac.za

\*Corresponding author: Penny Poomani Govender

Department of Applied Chemistry, University of Johannesburg, P. O. Box 17011,  
Doornfontein Campus, 2028, Johannesburg, South Africa

Email: pennyg@uj.ac.za

Tel: +27 11 559 6555

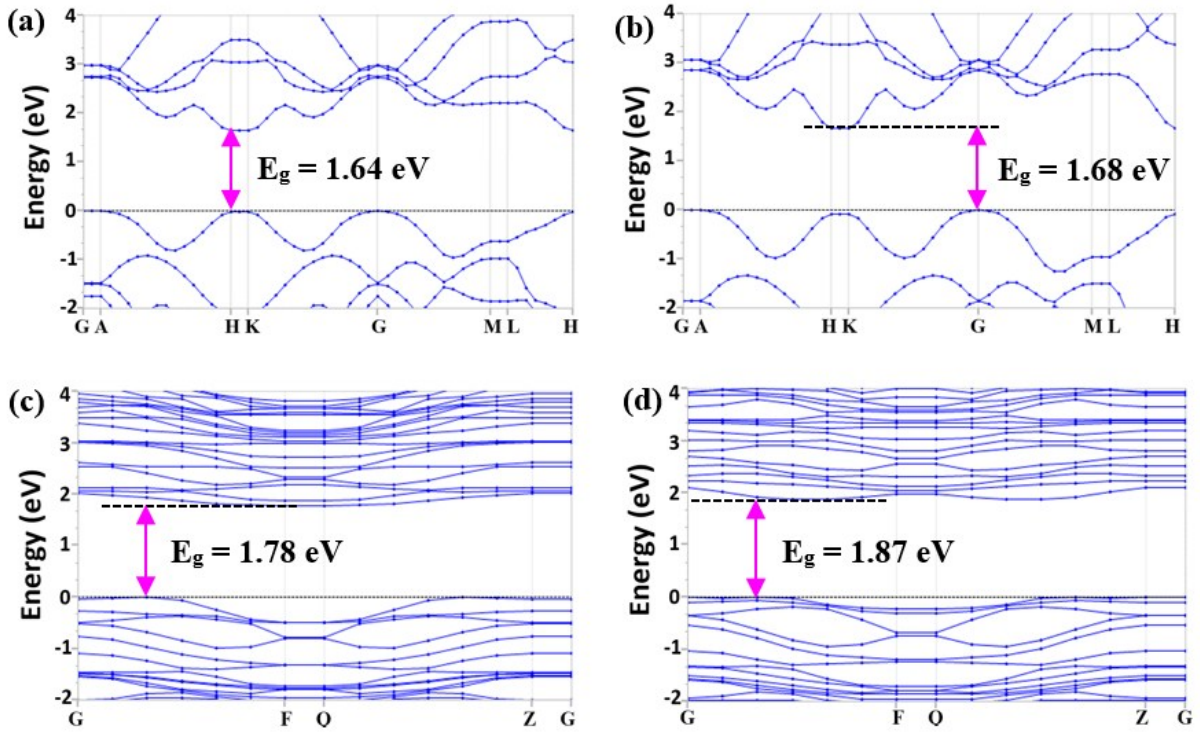

**Fig. S1.** Calculated unfolded band structure of (a) MoS<sub>2</sub>(001), (b) WS<sub>2</sub>(001), (c) MoS<sub>2</sub>/*m*-BiVO<sub>4</sub>(010) and (d) WS<sub>2</sub>/*m*-BiVO<sub>4</sub>(010) within the hybrid HSE06 functional. The Fermi level is set to zero as dashed horizontal black line.

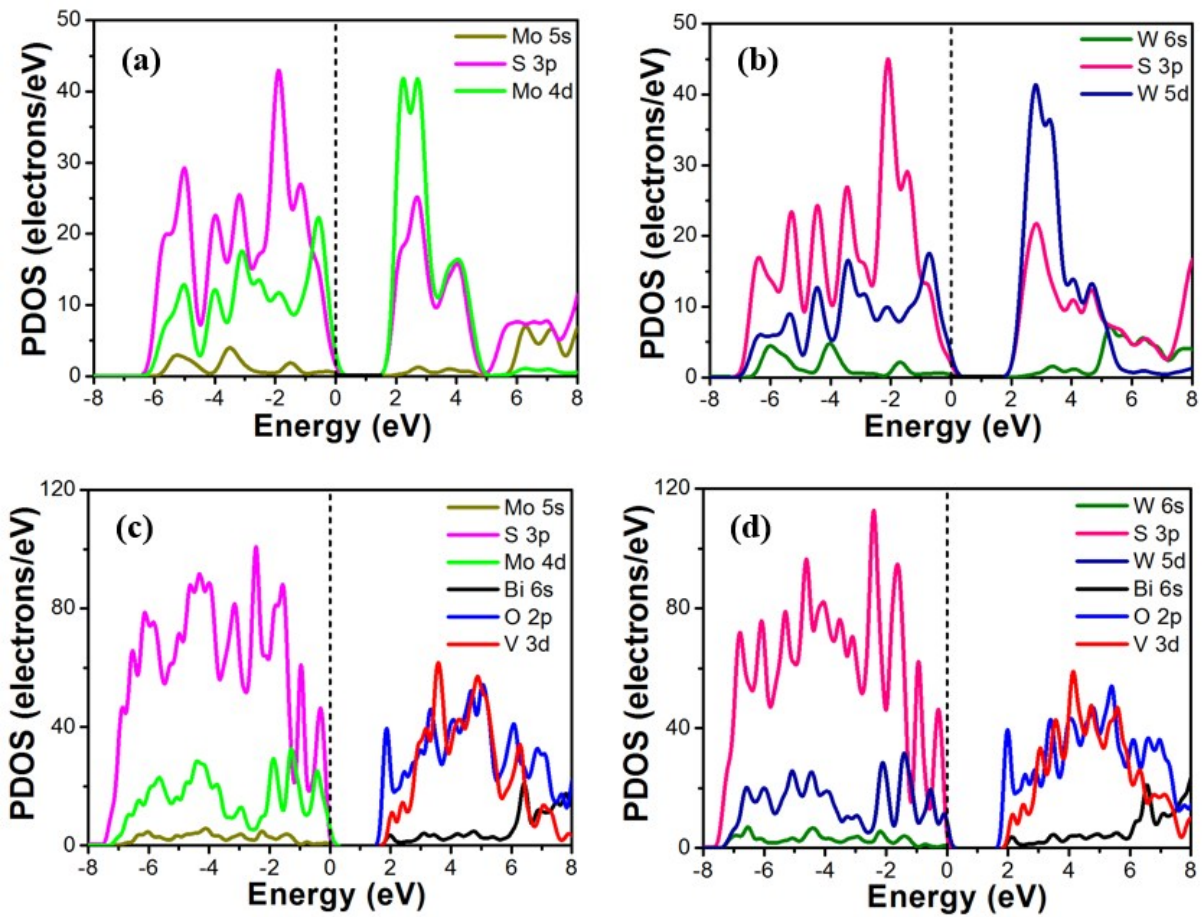

**Fig. S2.** Calculated PDOS of (a)  $\text{MoS}_2(001)$ , (b)  $\text{WS}_2(001)$ , (c)  $\text{MoS}_2/m\text{-BiVO}_4(010)$  and (d)  $\text{WS}_2/m\text{-BiVO}_4(010)$  within the hybrid HSE06 functional. The vertical dashed line is the Fermi level.

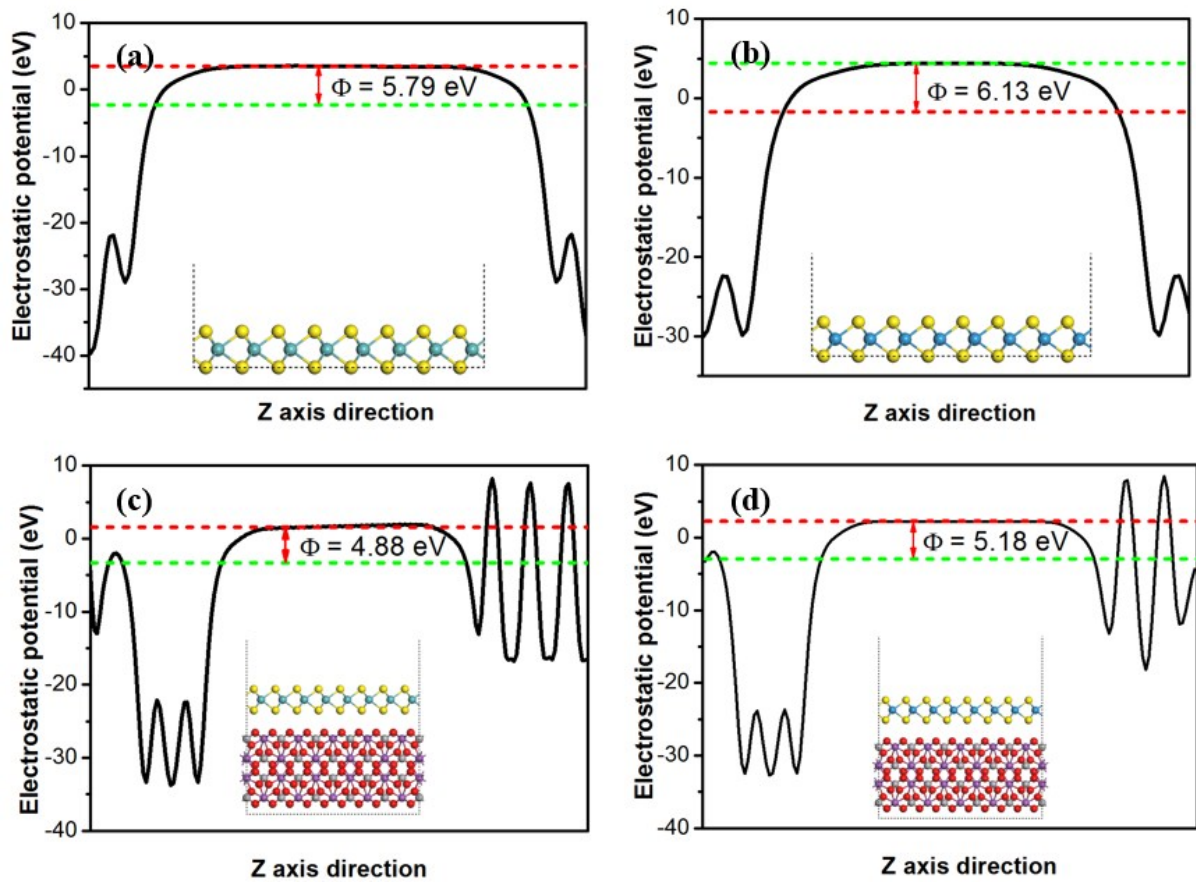

**Fig. S3.** The work function of the unfolded (a) MoS<sub>2</sub>(001), (b) WS<sub>2</sub>(001), (c) MoS<sub>2</sub>/*m*-BiVO<sub>4</sub>(010) and (d) WS<sub>2</sub>/*m*-BiVO<sub>4</sub>(010). The red and green dashed lines are the vacuum and Fermi level, respectively.
